# Supplementary material
Source: PubMed Central journal article supplement (PMC5716637)
Supplement: NIHMS923077-supplement-la5b02818_si_001_pdf.pdf [file NIHMS923077-supplement-la5b02818_si_001_pdf.pdf]

## Supporting Information

# Modulating the Substrate Selectivity of DNA Aptamers using Surfactants

Amberlyn M. Peterson,<sup>†</sup> Frank M. Jahnke,<sup>‡</sup> and Jennifer M. Heemstra<sup>\*†</sup>

<sup>†</sup>Department of Chemistry and the Center for Cell and Genome Science, University of Utah, Salt Lake City, Utah 84112, United States

<sup>‡</sup>Sonata Biosciences, Inc., Auburn, California 95603, United States

### Table of Contents

|                                                                  |    |
|------------------------------------------------------------------|----|
| <b>Table S1.</b> Steroid partitioning coefficients . . . . .     | S2 |
| <b>Table S2.</b> Chemical supplier information . . . . .         | S2 |
| <b>Table S3.</b> Tabular data for surfactant testing . . . . .   | S3 |
| <b>Table S4.</b> Tabular data for DIS aptamer with SDS . . . . . | S4 |
| <b>Table S5.</b> Tabular data for DCA aptamer with SDS . . . . . | S5 |
| <b>Table S6.</b> Tabular data for BE aptamer with SDS . . . . .  | S6 |

**Table S1.** Partitioning coefficients ( $\log D$ ) generated using the ChemAxon  $\log D$  calculator. All values calculated for pH= 7.4.

| Steroid | $\log D$ |
|---------|----------|
| DIS     | 1.04     |
| DOA     | 3.77     |
| DCA     | 1.15     |
| BE      | 3.75     |

**Table S2.** Chemical supplier information.

| Chemical                                                          | Supplier                              | Catalog Number | Purity/ Composition |
|-------------------------------------------------------------------|---------------------------------------|----------------|---------------------|
| Triton X-100                                                      | CalBioChem                            | 648466         | -                   |
| Tween 20                                                          | Sigma Life Sciences                   | P1379          | 47% Lauric acid     |
| Sodium dodecyl sulfate (SDS)                                      | Research Products International Group | L22010         | ≥99%                |
| Cetyl trimethylammonium bromide (CTAB)                            | Sigma Aldrich                         | H5882          | ≥98%                |
| 3-[(3-cholamidopropyl)dimethylammonio]-1-propanesulfonate (CHAPS) | Sigma Aldrich                         | C3023          | 98%                 |
| Dehydroisoandrosterone 3-sulfate sodium salt dihydrate (DIS)      | Sigma Aldrich                         | D5297          | ≥98%                |
| Deoxycholic acid sodium salt (DCA)                                | Sigma Aldrich                         | 30170          | ≥98%                |
| Beta-Estradiol (BE)                                               | Sigma Aldrich                         | E8875          | ≥98%                |
| Deoxycorticosterone acetate (DOA)                                 | Sigma Aldrich                         | D7000          | 97.8%               |

**Table S3.** Tabular data for the average percent displacement (% dis.) and standard deviation (s.d.) for three trials using the DIS biosensor in the presence of various surfactants.

| [DIS]<br>( $\mu\text{M}$ ) | buffer |      | SDS    |      | CTAB   |      |
|----------------------------|--------|------|--------|------|--------|------|
|                            | % dis. | s.d. | % dis. | s.d. | % dis. | s.d. |
| 3333                       | 19.29  | 0.92 | 21.02  | 0.44 | 2.64   | 0.24 |
| 1111                       | 19.06  | 0.58 | 15.87  | 0.39 | 1.33   | 0.07 |
| 370                        | 15.00  | 0.47 | 10.65  | 0.26 | 1.96   | 0.10 |
| 123                        | 11.01  | 0.41 | 6.62   | 0.19 | 2.03   | 0.10 |
| 41.2                       | 6.28   | 0.19 | 3.16   | 0.23 | 1.91   | 0.07 |
| 13.7                       | 3.01   | 0.09 | 2.06   | 0.05 | 1.89   | 0.08 |
| 4.57                       | 1.39   | 0.05 | 1.06   | 0.03 | 1.97   | 0.06 |
| 1.52                       | 0.72   | 0.03 | 1.49   | 0.05 | 1.76   | 0.07 |

| [DIS]<br>( $\mu\text{M}$ ) | CHAPS  |      | Tween 20 |      | Triton X-100 |      |
|----------------------------|--------|------|----------|------|--------------|------|
|                            | % dis. | s.d. | % dis.   | s.d. | % dis.       | s.d. |
| 3333                       | 7.32   | 0.13 | 21.32    | 0.72 | 18.31        | 0.44 |
| 1111                       | 3.93   | 0.09 | 16.18    | 0.42 | 12.61        | 0.45 |
| 370                        | 2.56   | 0.06 | 10.12    | 0.18 | 7.07         | 0.03 |
| 123                        | 2.02   | 0.06 | 5.78     | 0.12 | 3.78         | 0.07 |
| 41.2                       | 2.35   | 0.04 | 2.94     | 0.08 | 1.93         | 0.06 |
| 13.7                       | 1.64   | 0.03 | 1.48     | 0.05 | 1.25         | 0.04 |
| 4.57                       | 1.81   | 0.05 | 0.82     | 0.03 | 0.89         | 0.03 |
| 1.52                       | 1.47   | 0.05 | 0.40     | 0.01 | 0.85         | 0.03 |

**Table S4.** Tabular data for the average percent displacement (% dis.) and standard deviation (s.d.) for three trials using the DIS aptamer at various SDS concentrations with DOA or DIS as the ligand.

| [DOA]<br>( $\mu\text{M}$ ) | 0 % SDS |      | 0.01% SDS |      | 1 % SDS |      | 4 % SDS |      |
|----------------------------|---------|------|-----------|------|---------|------|---------|------|
|                            | % dis.  | s.d. | % dis.    | s.d. | % dis.  | s.d. | % dis.  | s.d. |
| 3333                       | 4.98    | 1.64 | 0.43      | 1.44 | 0.35    | 2.48 | -0.24   | 1.72 |
| 1111                       | 8.34    | 1.33 | 6.01      | 1.40 | -0.20   | 2.12 | -0.43   | 2.07 |
| 370                        | 11.38   | 1.04 | 11.52     | 1.34 | 0.40    | 2.28 | -0.39   | 1.33 |
| 123                        | 13.11   | 1.10 | 12.12     | 1.60 | -0.29   | 1.62 | -0.09   | 1.77 |
| 41.2                       | 10.15   | 0.92 | 9.38      | 0.13 | -1.27   | 2.23 | -1.09   | 0.46 |
| 13.7                       | 5.93    | 0.74 | 5.57      | 0.77 | -0.73   | 2.31 | -0.29   | 1.48 |
| 4.57                       | 2.32    | 1.10 | 2.80      | 0.84 | -0.26   | 2.09 | 0.17    | 1.40 |
| 1.52                       | 0.83    | 1.06 | 1.34      | 1.15 | -0.97   | 1.87 | -0.40   | 1.54 |

| [DIS]<br>( $\mu\text{M}$ ) | 0 % SDS |      | 0.01% SDS |      | 1 % SDS |      | 4 % SDS |      |
|----------------------------|---------|------|-----------|------|---------|------|---------|------|
|                            | % dis.  | s.d. | % dis.    | s.d. | % dis.  | s.d. | % dis.  | s.d. |
| 3333                       | 19.27   | 1.55 | 22.07     | 1.46 | 18.54   | 2.94 | 16.49   | 2.23 |
| 1111                       | 17.43   | 0.82 | 18.14     | 1.32 | 15.34   | 2.86 | 12.44   | 2.77 |
| 370                        | 13.67   | 1.68 | 12.87     | 1.55 | 10.09   | 2.95 | 6.46    | 1.20 |
| 123                        | 9.11    | 1.04 | 8.69      | 1.07 | 4.37    | 2.98 | 2.78    | 1.08 |
| 41.2                       | 5.00    | 0.49 | 4.29      | 0.96 | 0.71    | 2.06 | 1.26    | 1.54 |
| 13.7                       | 1.63    | 0.87 | 1.51      | 0.80 | 0.10    | 2.01 | -0.16   | 1.22 |
| 4.57                       | 0.82    | 0.85 | 0.82      | 0.79 | -0.70   | 2.10 | 0.21    | 1.43 |
| 1.52                       | 0.81    | 1.06 | 0.11      | 0.86 | -0.48   | 2.87 | -0.09   | 1.75 |

**Table S5.** Tabular data for the average percent displacement (% dis.) and standard deviation (s.d.) for three trials using the DCA aptamer at various SDS concentrations with DCA or DIS as the ligand.

| [DCA]<br>( $\mu\text{M}$ ) | 0 % SDS |      | 0.01% SDS |      | 1 % SDS |      | 4 % SDS |      |
|----------------------------|---------|------|-----------|------|---------|------|---------|------|
|                            | % dis.  | s.d. | % dis.    | s.d. | % dis.  | s.d. | % dis.  | s.d. |
| 3333                       | 26.01   | 1.16 | 36.78     | 2.05 | 16.10   | 2.03 | 9.57    | 1.45 |
| 1111                       | 23.66   | 2.50 | 33.52     | 3.15 | 8.37    | 2.74 | 3.68    | 2.64 |
| 370                        | 23.18   | 3.93 | 29.87     | 4.37 | 3.22    | 1.47 | 2.78    | 1.64 |
| 123                        | 20.66   | 0.81 | 22.72     | 6.70 | 1.59    | 1.62 | 1.47    | 1.13 |
| 41.2                       | 12.89   | 1.51 | 14.77     | 2.40 | 0.40    | 1.69 | 0.77    | 2.58 |
| 13.7                       | 6.54    | 1.87 | 7.10      | 2.91 | -0.36   | 2.15 | 1.37    | 1.78 |
| 4.57                       | 1.99    | 1.11 | 3.19      | 1.30 | 0.17    | 1.79 | 1.83    | 2.62 |
| 1.52                       | 0.59    | 1.04 | 0.70      | 1.99 | 1.52    | 2.00 | 1.93    | 2.11 |

| [DIS]<br>( $\mu\text{M}$ ) | 0 % SDS |      | 0.01% SDS |      | 1 % SDS |      | 4 % SDS |      |
|----------------------------|---------|------|-----------|------|---------|------|---------|------|
|                            | % dis.  | s.d. | % dis.    | s.d. | % dis.  | s.d. | % dis.  | s.d. |
| 3333                       | 38.73   | 2.63 | 44.36     | 4.34 | 41.45   | 2.84 | 30.43   | 3.29 |
| 1111                       | 33.87   | 4.41 | 39.97     | 3.50 | 29.24   | 3.19 | 20.45   | 2.96 |
| 370                        | 21.15   | 2.51 | 25.96     | 2.70 | 17.22   | 2.25 | 9.18    | 2.74 |
| 123                        | 10.40   | 1.19 | 12.55     | 1.14 | 7.16    | 1.71 | 4.03    | 2.31 |
| 41.2                       | 3.90    | 1.03 | 3.10      | 4.19 | 1.43    | 2.86 | 0.49    | 1.00 |
| 13.7                       | 0.58    | 1.00 | 1.27      | 1.29 | 1.33    | 1.85 | 0.14    | 0.64 |
| 4.57                       | -0.08   | 1.08 | 0.75      | 0.73 | 0.04    | 1.12 | -0.50   | 1.52 |
| 1.52                       | -0.16   | 0.65 | -0.45     | 1.60 | 0.60    | 1.42 | -0.89   | 1.46 |

**Table S6.** Tabular data for the average percent displacement (% dis.) and standard deviation (s.d.) for three trials using the BE aptamer at various SDS concentrations with BE or DIS as the ligand.

| [BE]<br>( $\mu\text{M}$ ) | 0 % SDS |      | 0.01% SDS |      | 1 % SDS |      | 4 % SDS |      |
|---------------------------|---------|------|-----------|------|---------|------|---------|------|
|                           | % dis.  | s.d. | % dis.    | s.d. | % dis.  | s.d. | % dis.  | s.d. |
| 3333                      | 10.41   | 0.96 | 18.52     | 1.70 | 13.00   | 2.00 | 9.73    | 0.32 |
| 1111                      | 11.97   | 1.03 | 14.05     | 0.24 | 8.24    | 0.30 | 5.31    | 0.27 |
| 370                       | 12.84   | 0.23 | 13.01     | 0.33 | 6.04    | 0.64 | 2.16    | 0.28 |
| 123                       | 12.89   | 0.36 | 11.25     | 0.29 | 3.25    | 0.05 | 1.46    | 0.10 |
| 41.2                      | 15.93   | 1.87 | 12.83     | 0.51 | 1.34    | 0.32 | 0.65    | 0.15 |
| 13.7                      | 9.27    | 0.63 | 8.59      | 0.04 | 1.08    | 0.02 | 1.54    | 0.47 |
| 4.57                      | 4.50    | 0.51 | 4.72      | 0.12 | 1.06    | 0.11 | 1.35    | 0.12 |
| 1.52                      | 2.11    | 0.20 | 2.15      | 0.06 | 0.60    | 0.10 | 1.18    | 0.07 |

| [DIS]<br>( $\mu\text{M}$ ) | 0 % SDS |      | 0.01% SDS |      | 1 % SDS |      | 4 % SDS |      |
|----------------------------|---------|------|-----------|------|---------|------|---------|------|
|                            | % dis.  | s.d. | % dis.    | s.d. | % dis.  | s.d. | % dis.  | s.d. |
| 3333                       | 21.70   | 1.11 | 22.68     | 0.56 | 15.86   | 0.91 | 10.21   | 0.67 |
| 1111                       | 12.42   | 0.22 | 13.16     | 0.24 | 8.86    | 0.12 | 5.15    | 0.57 |
| 370                        | 6.03    | 0.14 | 6.36      | 0.16 | 4.40    | 0.37 | 2.63    | 0.08 |
| 123                        | 2.77    | 0.08 | 3.14      | 0.13 | 1.76    | 0.10 | 1.59    | 0.25 |
| 41.2                       | 1.67    | 0.44 | 1.83      | 0.15 | 1.04    | 0.23 | 1.09    | 0.17 |
| 13.7                       | 0.74    | 0.19 | 1.11      | 0.07 | 1.04    | 0.03 | 1.45    | 0.22 |
| 4.57                       | 0.62    | 0.11 | 0.93      | 0.14 | 0.82    | 0.09 | 1.98    | 0.21 |
| 1.52                       | 1.03    | 0.10 | 0.85      | 0.08 | 1.43    | 0.09 | 1.14    | 0.22 |
